# Supplementary material for: Foot-and-Mouth Disease Virus 3A Hijacks Sar1 and Sec12 for ER Remodeling in a COPII-Independent Manner
Source: MDPI journal article supplement (doi:10.3390/v14040839), 2022-04-18
Supplement: s1 [file s1]

Archive with 1 entries (1 files):
- Supplementary data 20220804.pdf
